# Supplementary material for: Melatonin as a Repairing Agent in Cadmium- and Free Fatty Acid-Induced Lipotoxicity
Source: MDPI journal article supplement (doi:10.3390/biom13121758), 2023-12-07

Original immunoblots Figure 3

A) Phospho-ERK1/2

Chemiluminescence

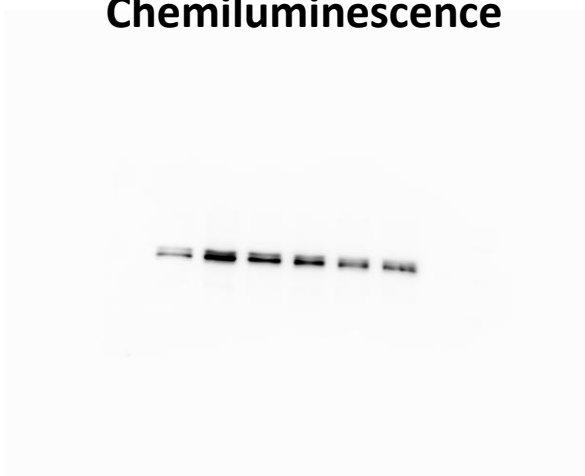

Colorimetric (merge)

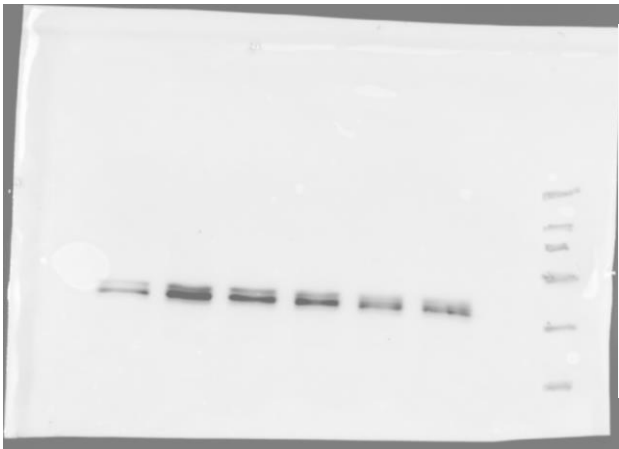

A) ERK1/2

Chemiluminescence

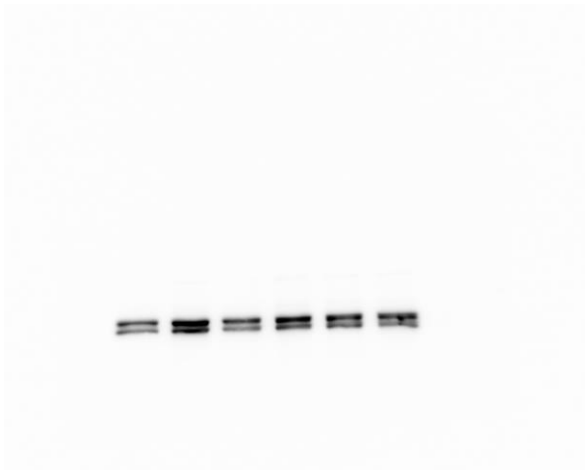

Colorimetric (merge)

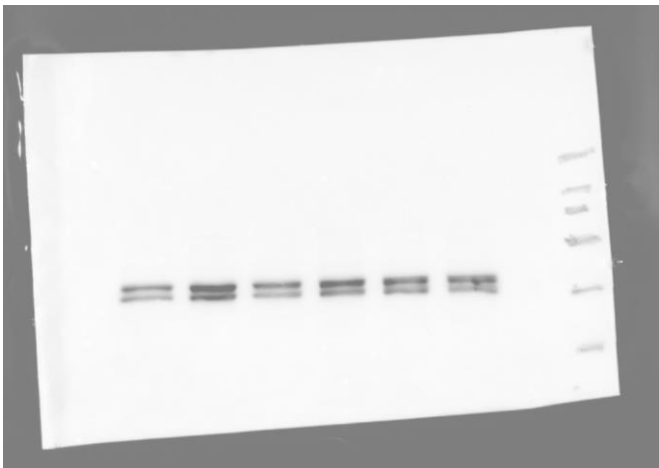

B) Phospho-SAPK/JNK

Chemiluminescence

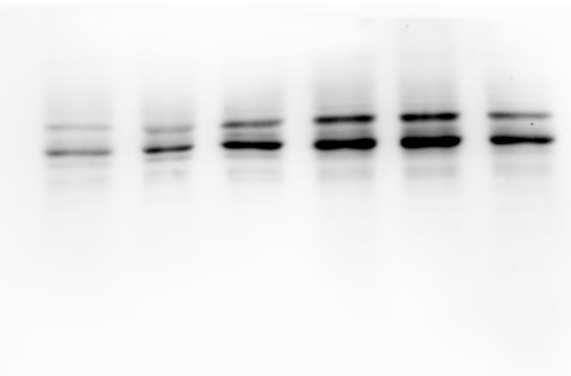

Colorimetric (merge)

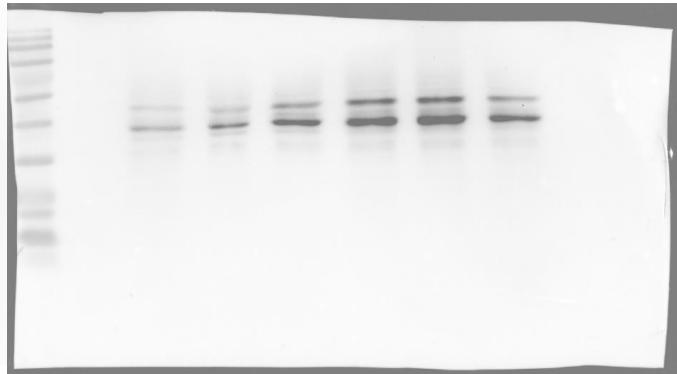

B) SAPK-JNK

Chemiluminescence

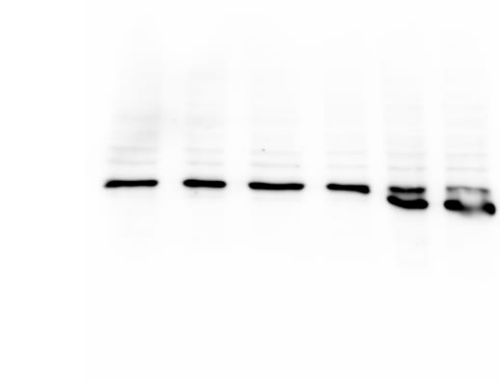

Colorimetric (merge)

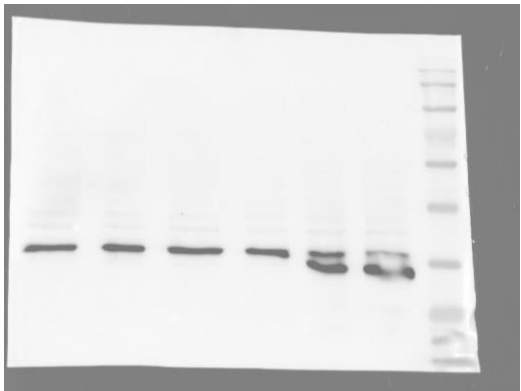

Original immunoblots Figure 3

C) Phospho-p38

Chemiluminescence

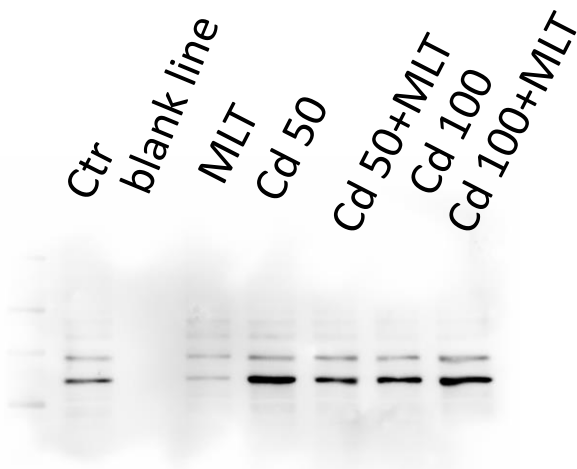

Colorimetric (merge)

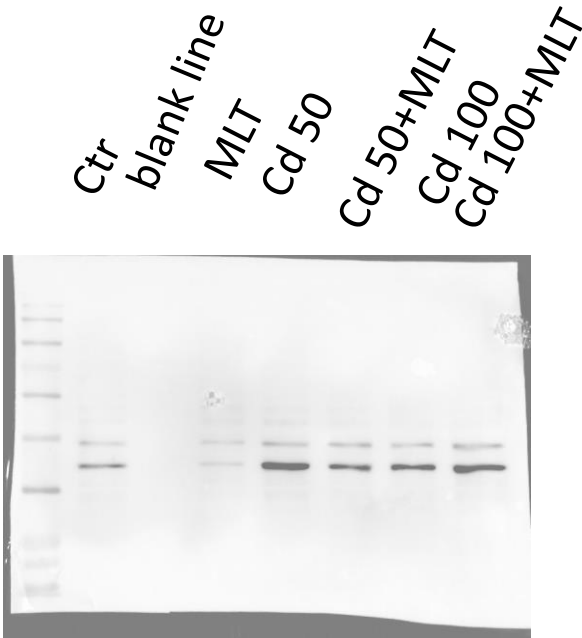

C) p38

Chemiluminescence

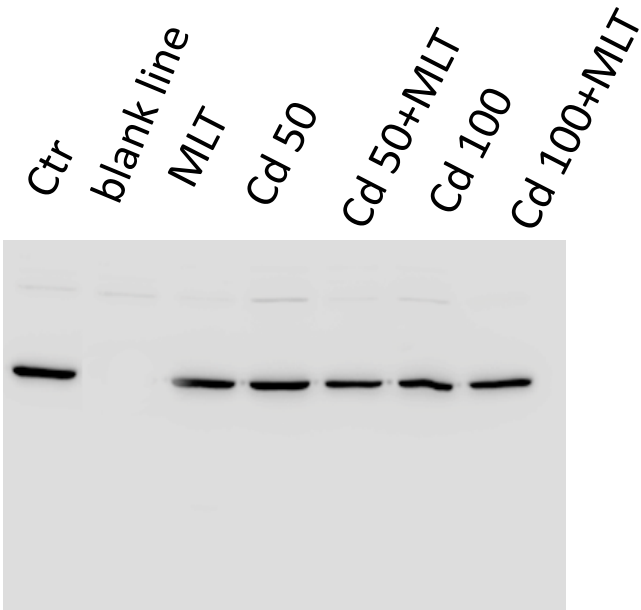

Original immunoblots Supplementary Figure S3

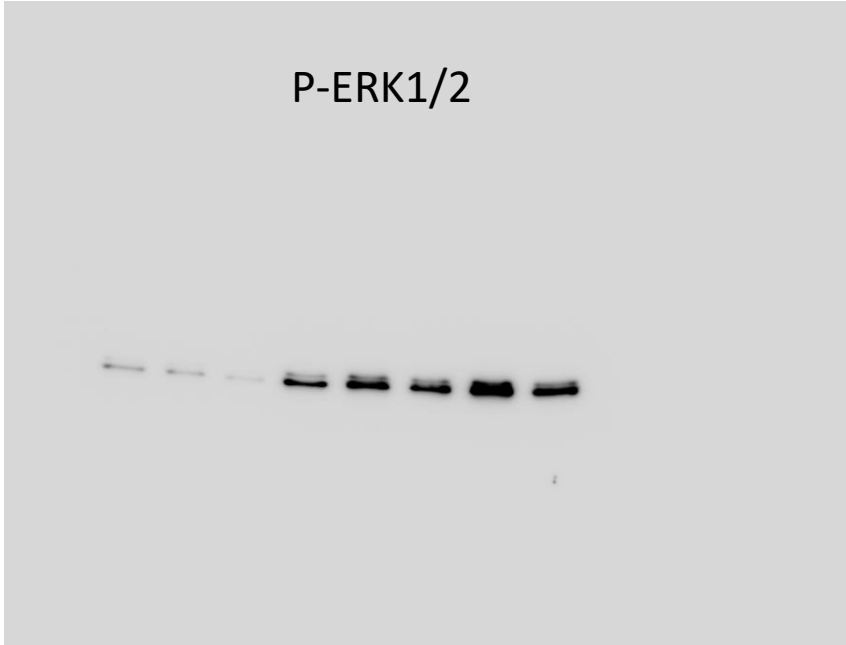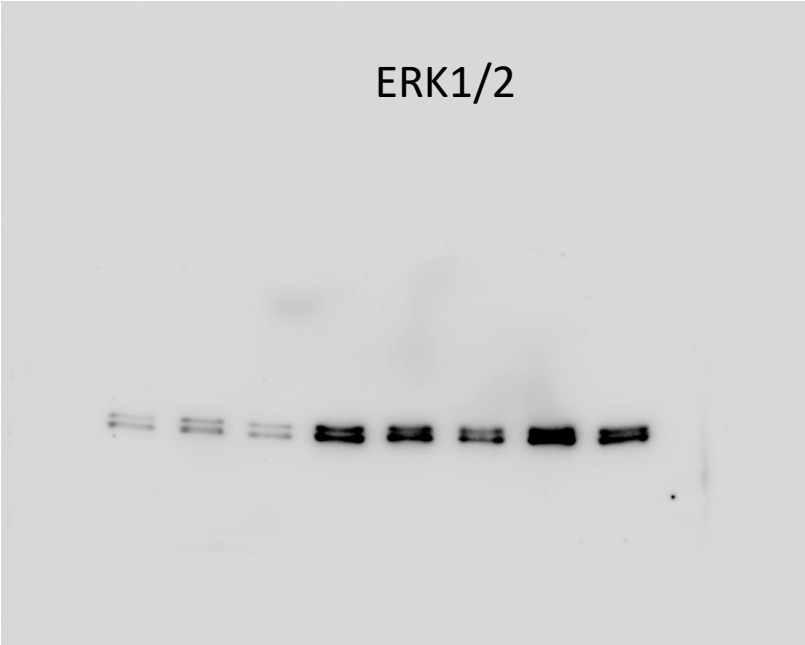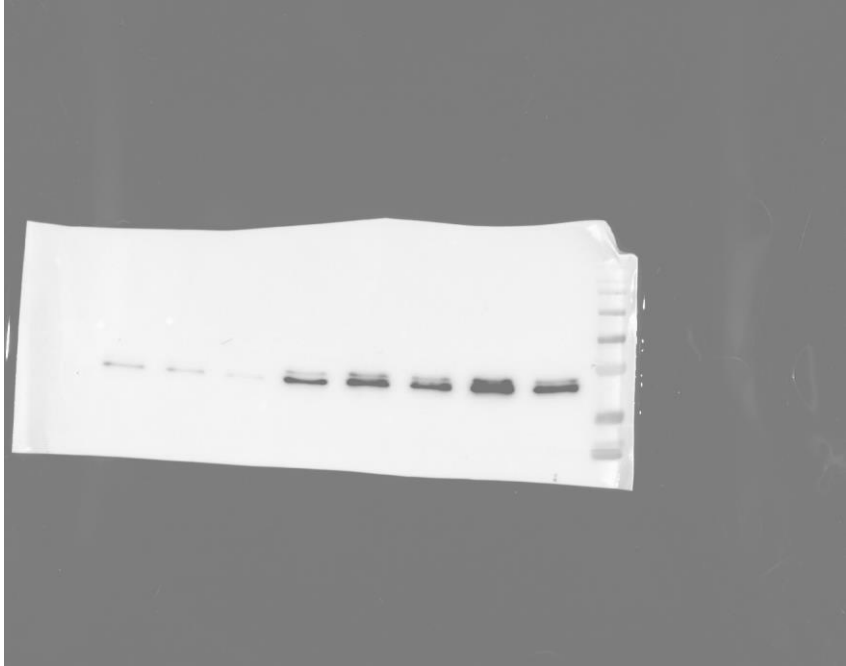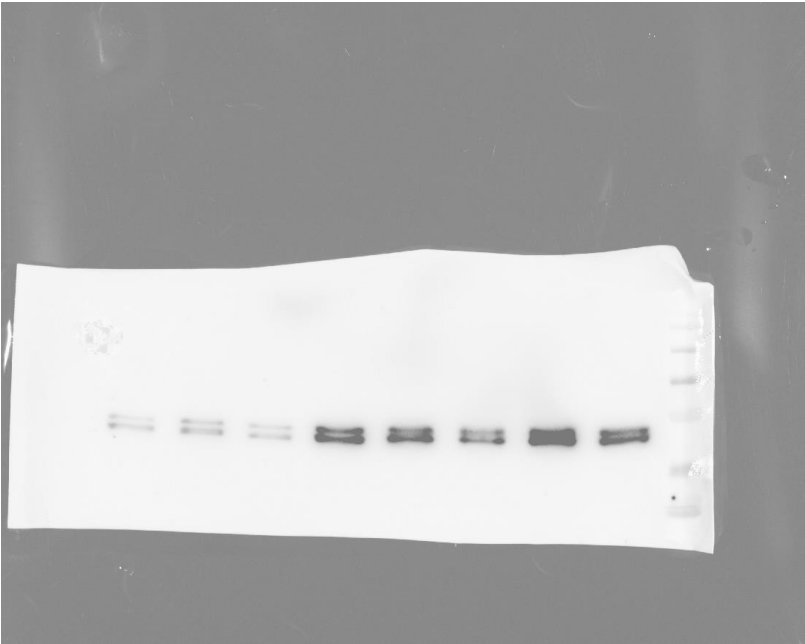

Original immunoblots Supplementary Figure S4

A) CAT

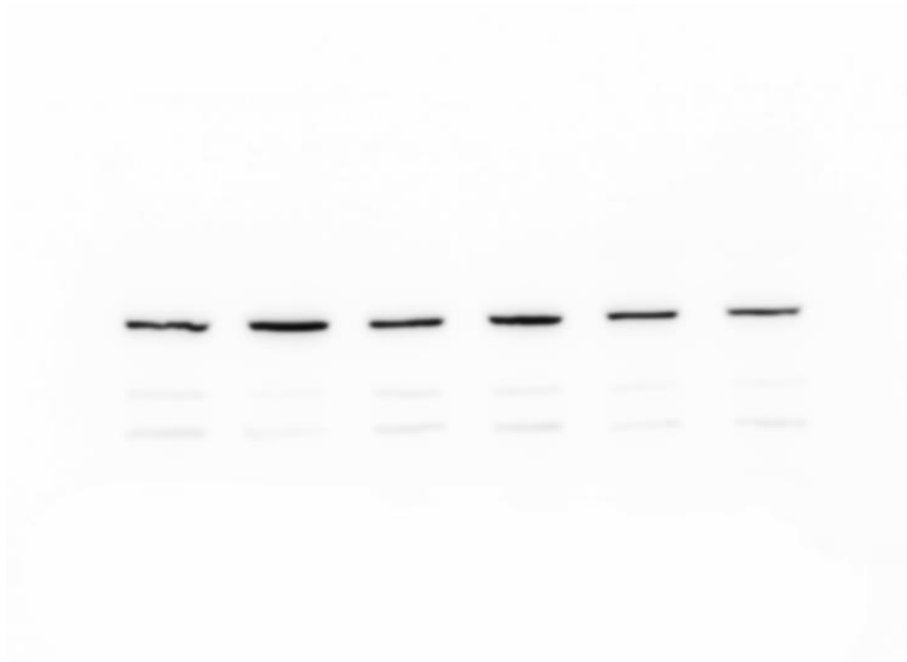

A) SOD2

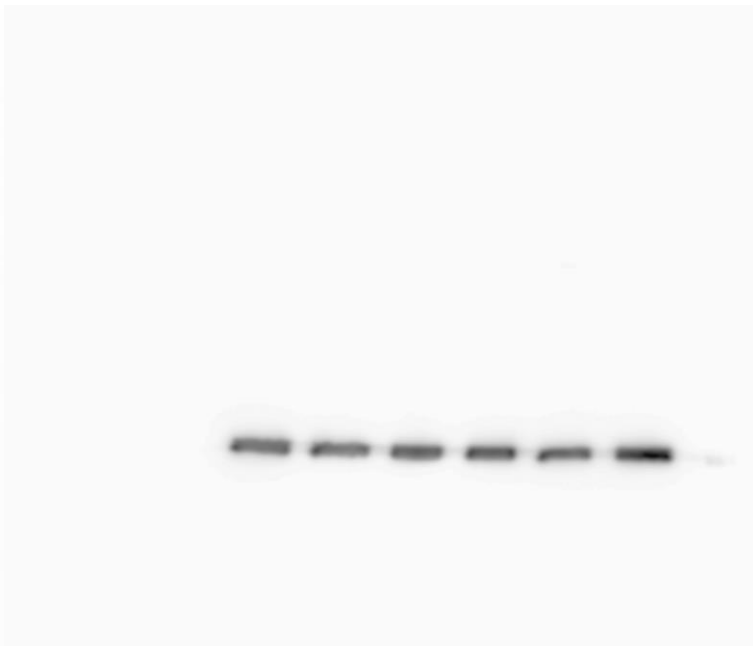

A) GAPDH

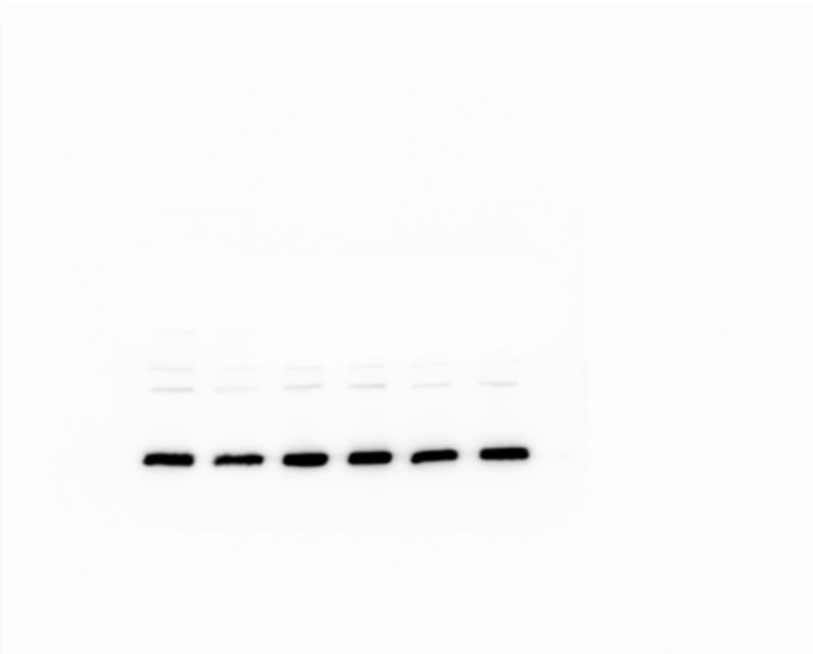

C) CAT

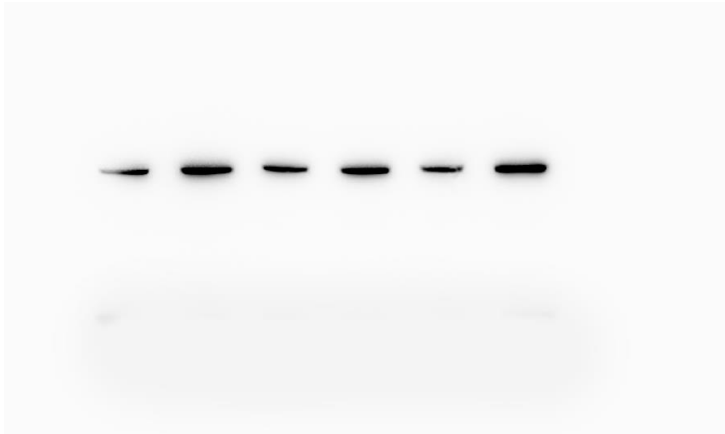

C) SOD2

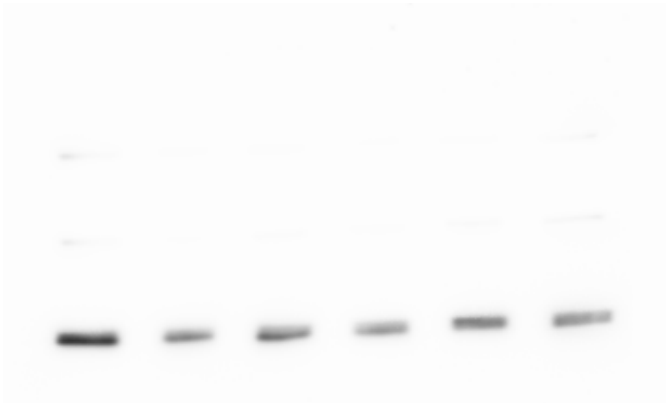

C) GAPDH

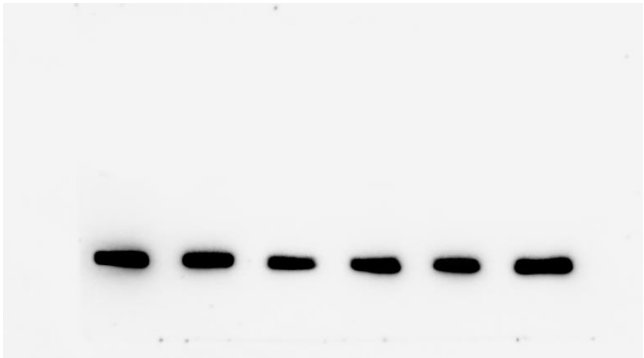

## Original immunoblots Supplementary Figure S5

A) 5-LOX

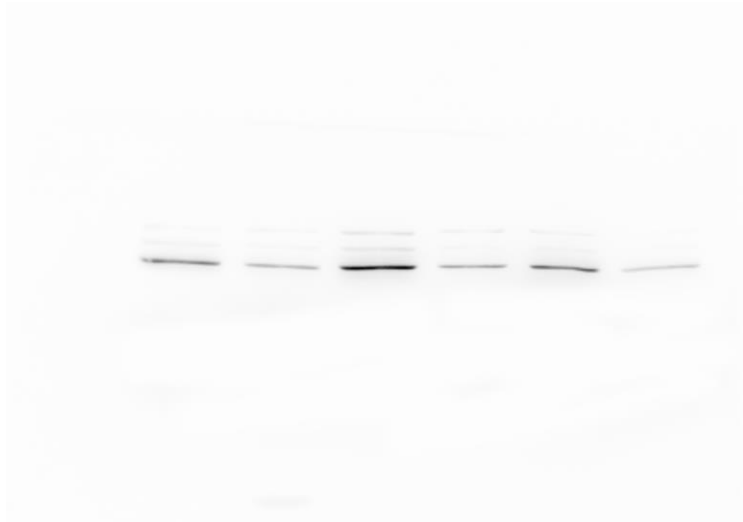

A)  $\beta$ -Tubulin

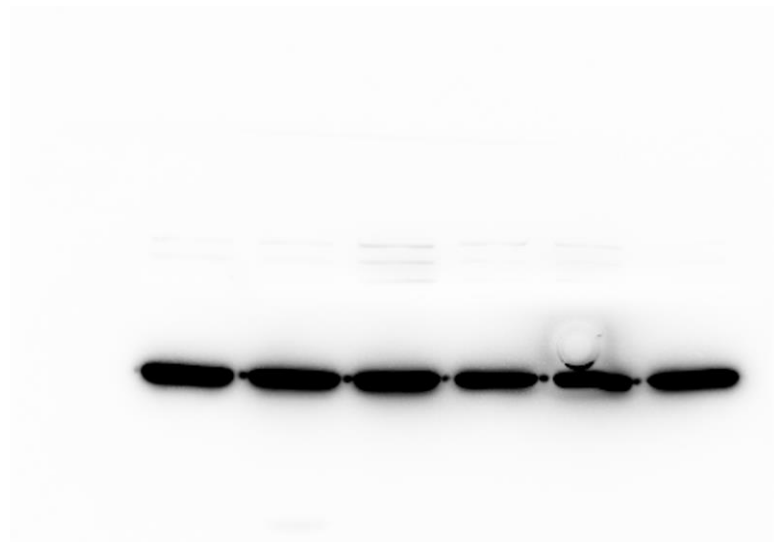

B) 5-LOX

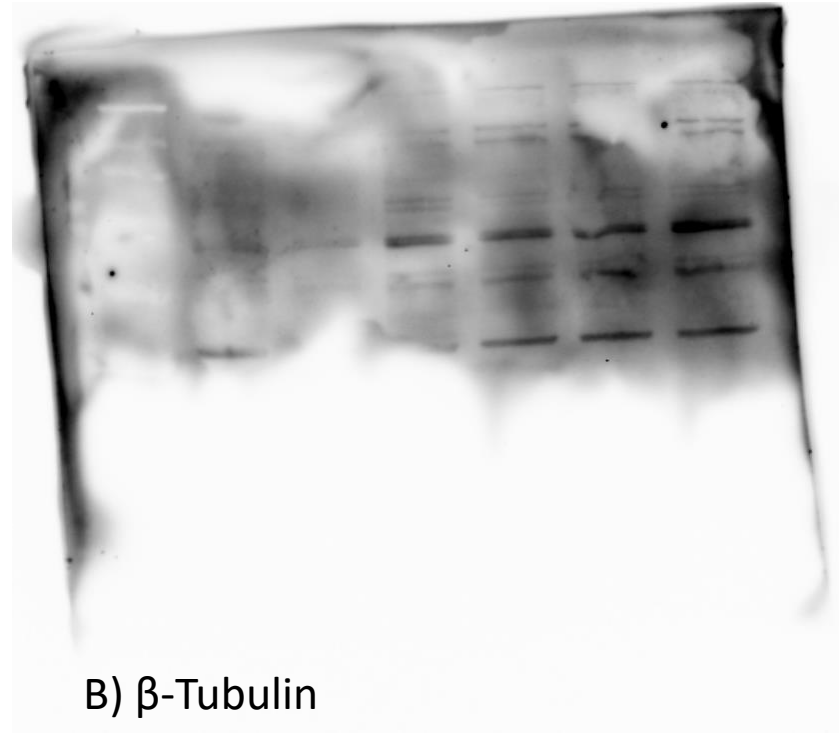

B)  $\beta$ -Tubulin

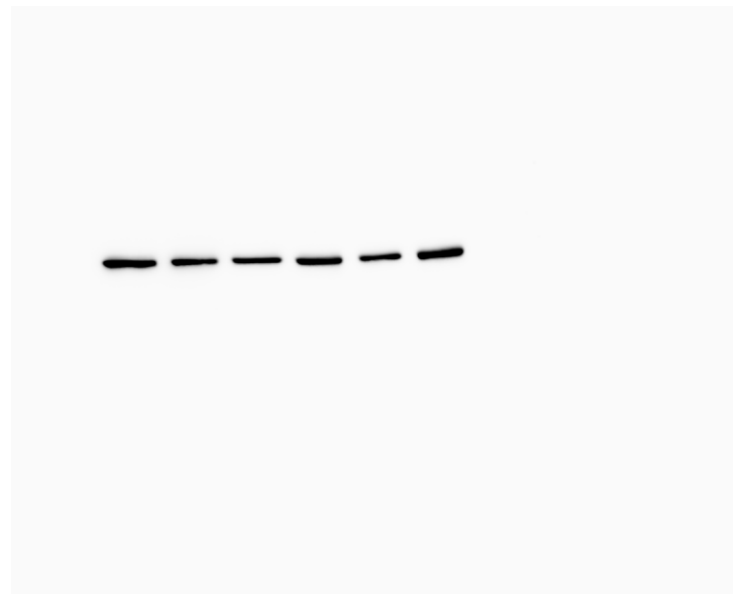

Supplement: s1 [file s1]
