# Supplementary material for: Melatonin as a Repairing Agent in Cadmium- and Free Fatty Acid-Induced Lipotoxicity
Source: MDPI journal article supplement (doi:10.3390/biom13121758), 2023-12-07
Supplement: s1 [file s1]

## Supplementary materials

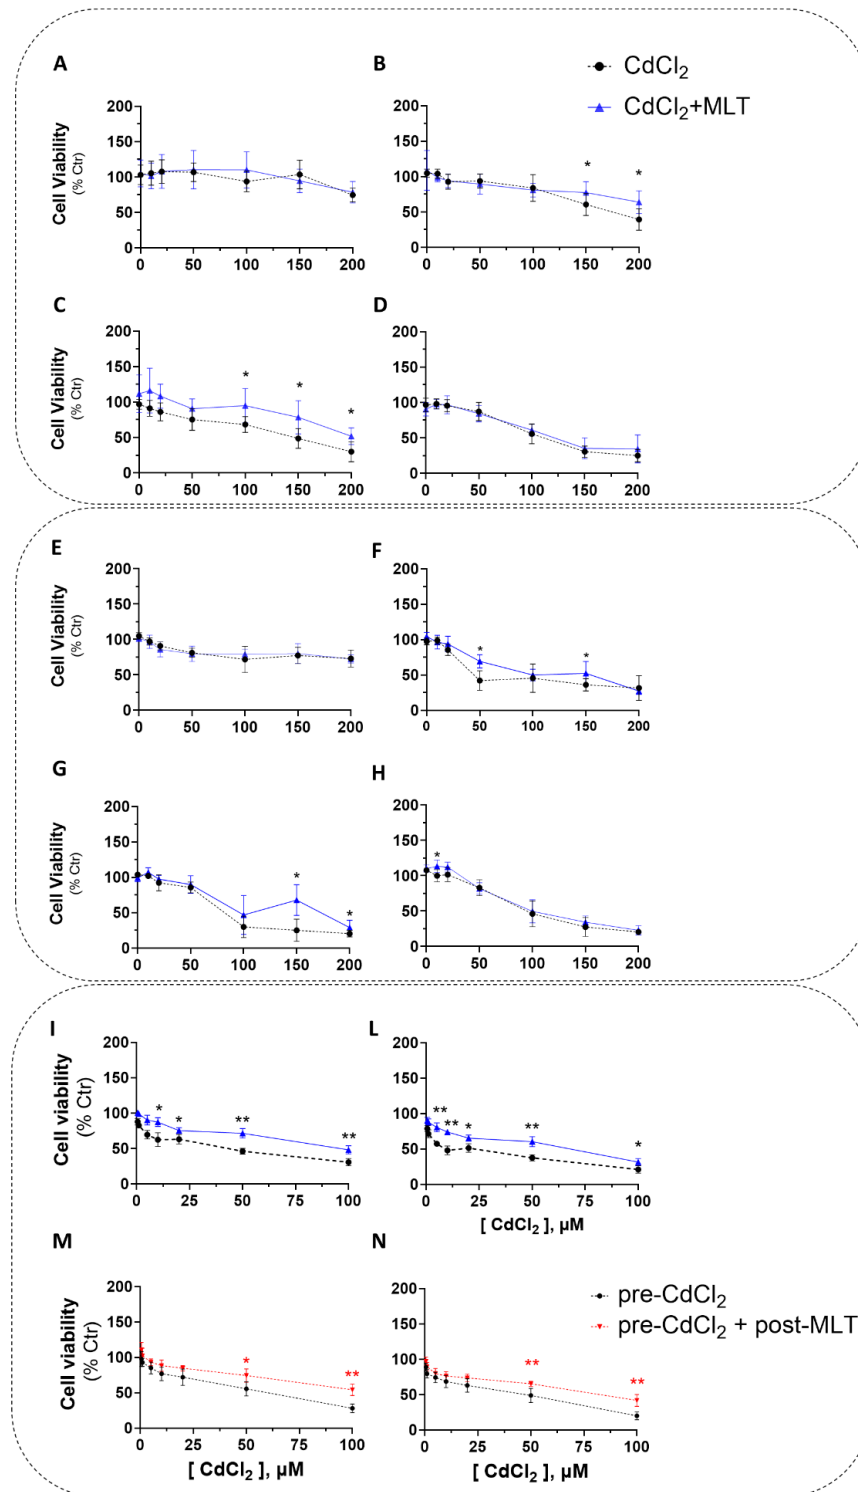

**Supplementary Figure S1. Concentration- and time-dependent effect of CdCl<sub>2</sub> and cytoprotective effect of MLT on cell viability of HepaRG cells (A-D), CACO-2 cells (E-H) and primary murine hepatocytes (I-N).** The cell tests were performed using the EP1 of Figure 1. (A and E) 3h, (B and F) 24h, (C, G and I) 48 h and (D, H and L) 72h. primary murine hepatocytes were pre-treated with CdCl<sub>2</sub> 24h and then treated with 50 nM MLT for 24 h (M) or 48h (N). One-way ANOVA test. \*p<0,05; \*\*p<0.01 (CdCl<sub>2</sub> vs. CdCl<sub>2</sub>+MLT or pre-CdCl<sub>2</sub> vs. pre-CdCl<sub>2</sub>+ post MLT).

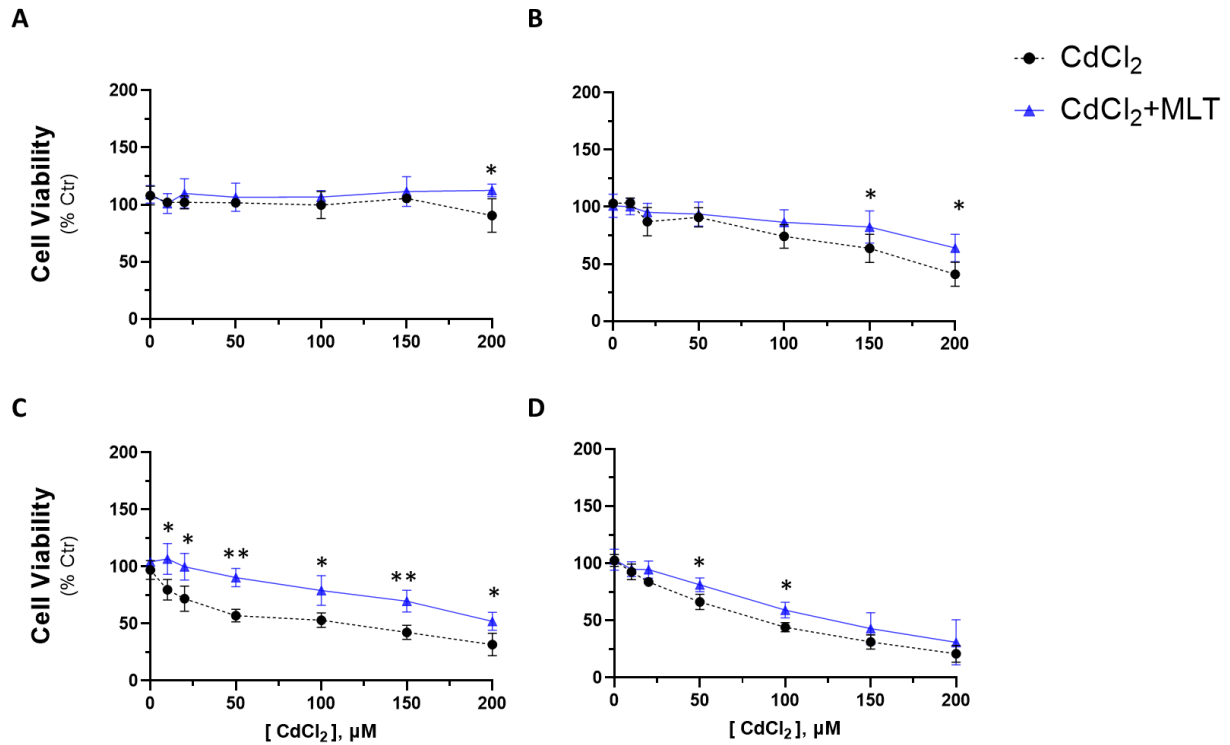

**Supplementary Figure S2. Concentration- and time-dependent effect of CdCl<sub>2</sub> on cell viability of HepaRG cells differentiated to hepatocyte-like cells, and cytoprotective effect of MLT.** The cell tests were performed using the EP1 of Figure 1. (A) 3h, (B) 24h, (C) 48 h and (D) 72h. One-way ANOVA test. \*p<0,05; \*\*p<0.01 (CdCl<sub>2</sub> vs. CdCl<sub>2</sub>+MLT).

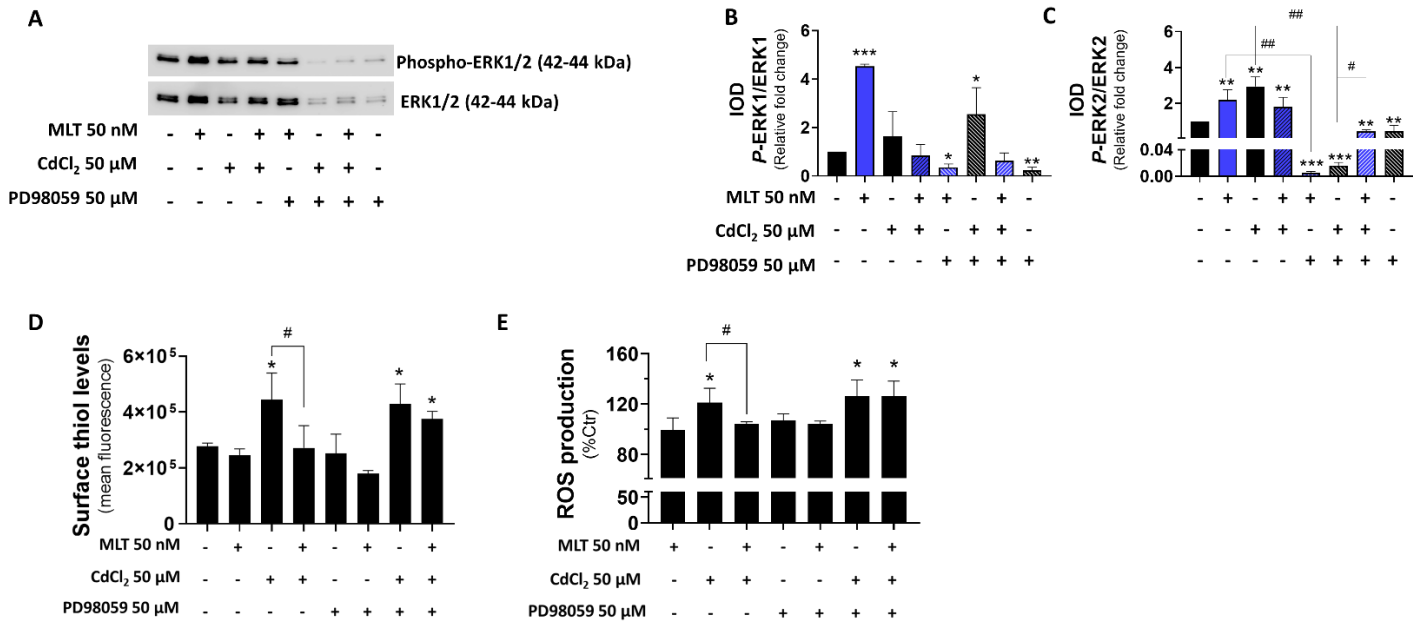

**Supplementary Figure S3. Effects of MAPKs ERK1/2 activity MLT-related in HepaRG cells pre-treated with ERK inhibitor and treated with CdCl<sub>2</sub> and MLT.** (A-C) MAPK-ERK1-2, (D) surface thiol levels and (E) ROS were evaluated in HepaRG cells after cells pre-treatment with ERK inhibitor (PD98059) 1h and then treatment with CdCl<sub>2</sub> (50 μM) and MLT (50 nM) for 3h. One-way ANOVA test: \*p<0.05; \*\*p<0.01; \*\*\*p<0.0001 (control vs. all treatments). #p<0.05; ##p<0.01 (CdCl<sub>2</sub> vs. all treatments).

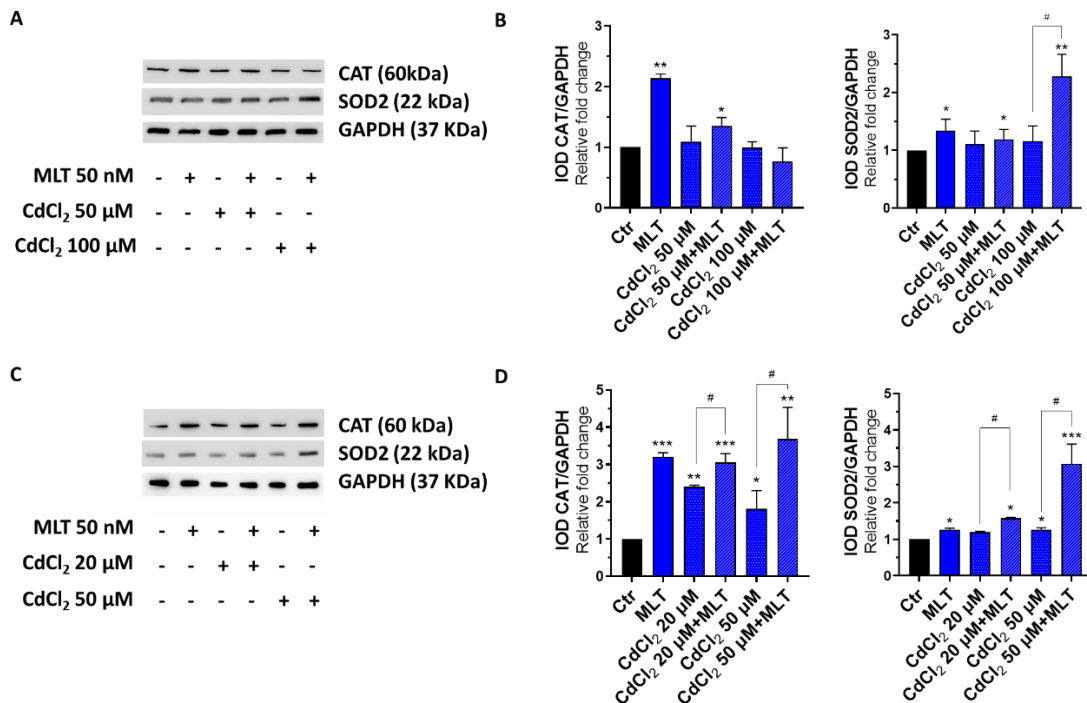

**Supplementary Figure S4. Immunoblotting of antioxidant enzymes in HepaRG (A-B) and CACO-2 (C-D) cells treated for 24hrs with CdCl<sub>2</sub> and/or MLT.** Relative optical density of the immunoblot bands as relative fold change of Ctr is represented in panel B and D. CAT, catalase; SOD, superoxide dismutase. \*p<0.05; \*\*p<0.001; \*\*\*p<0.0001 (Ctr vs. all treatments); #p<0.05 (CdCl<sub>2</sub> vs CdCl<sub>2</sub>+MLT).

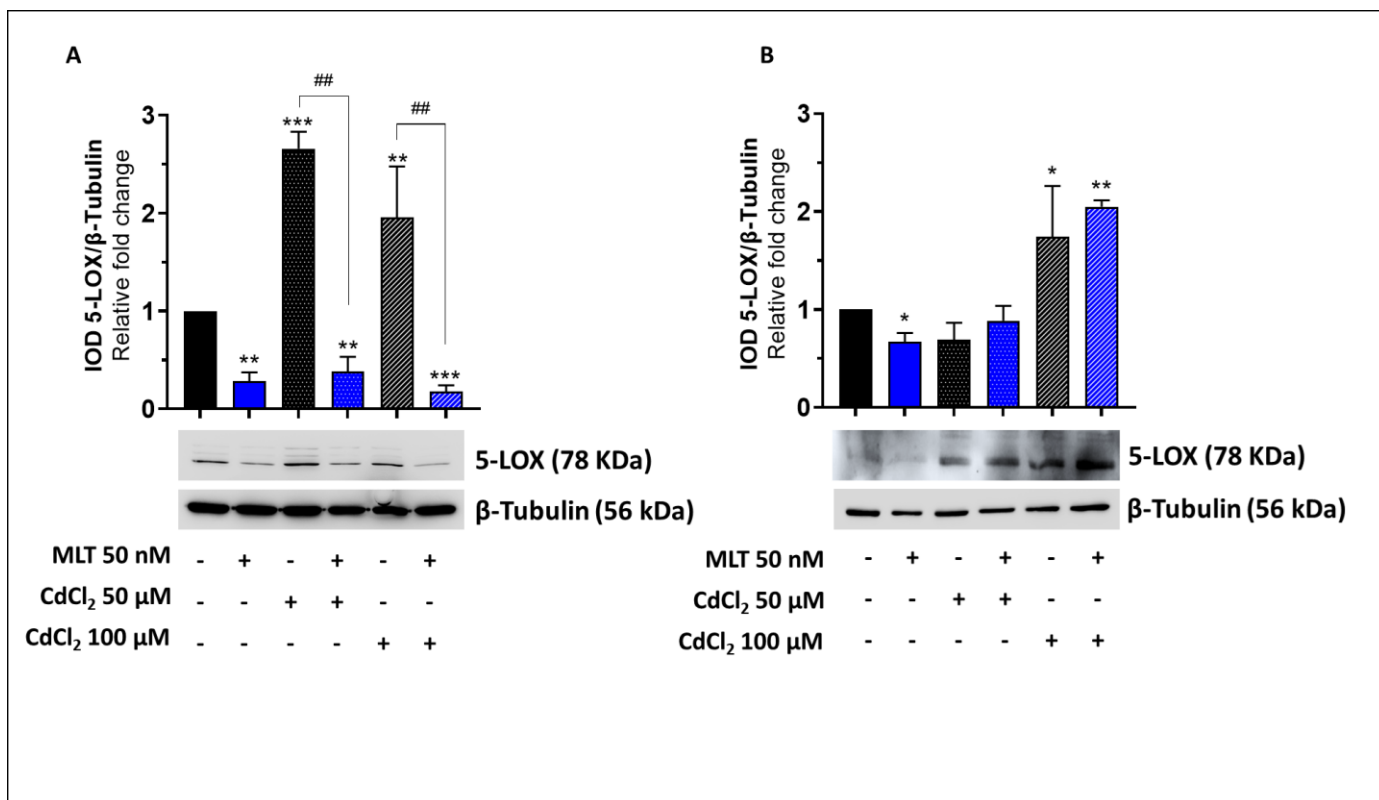

**Supplementary Figure S5. Immunoblotting of 5-LOX in HepaRG (A) and CACO-2 (B) cells treated for 4 hrs with CdCl<sub>2</sub> and/or MLT.** Relative optical density of the immunoblot bands as relative fold change of Ctr is represented. \* $p < 0.05$ ; \*\* $p < 0.001$ ; \*\*\* $p < 0.0001$  (Ctr vs. all treatments); ## $p < 0.01$  (CdCl<sub>2</sub> vs CdCl<sub>2</sub>+MLT).

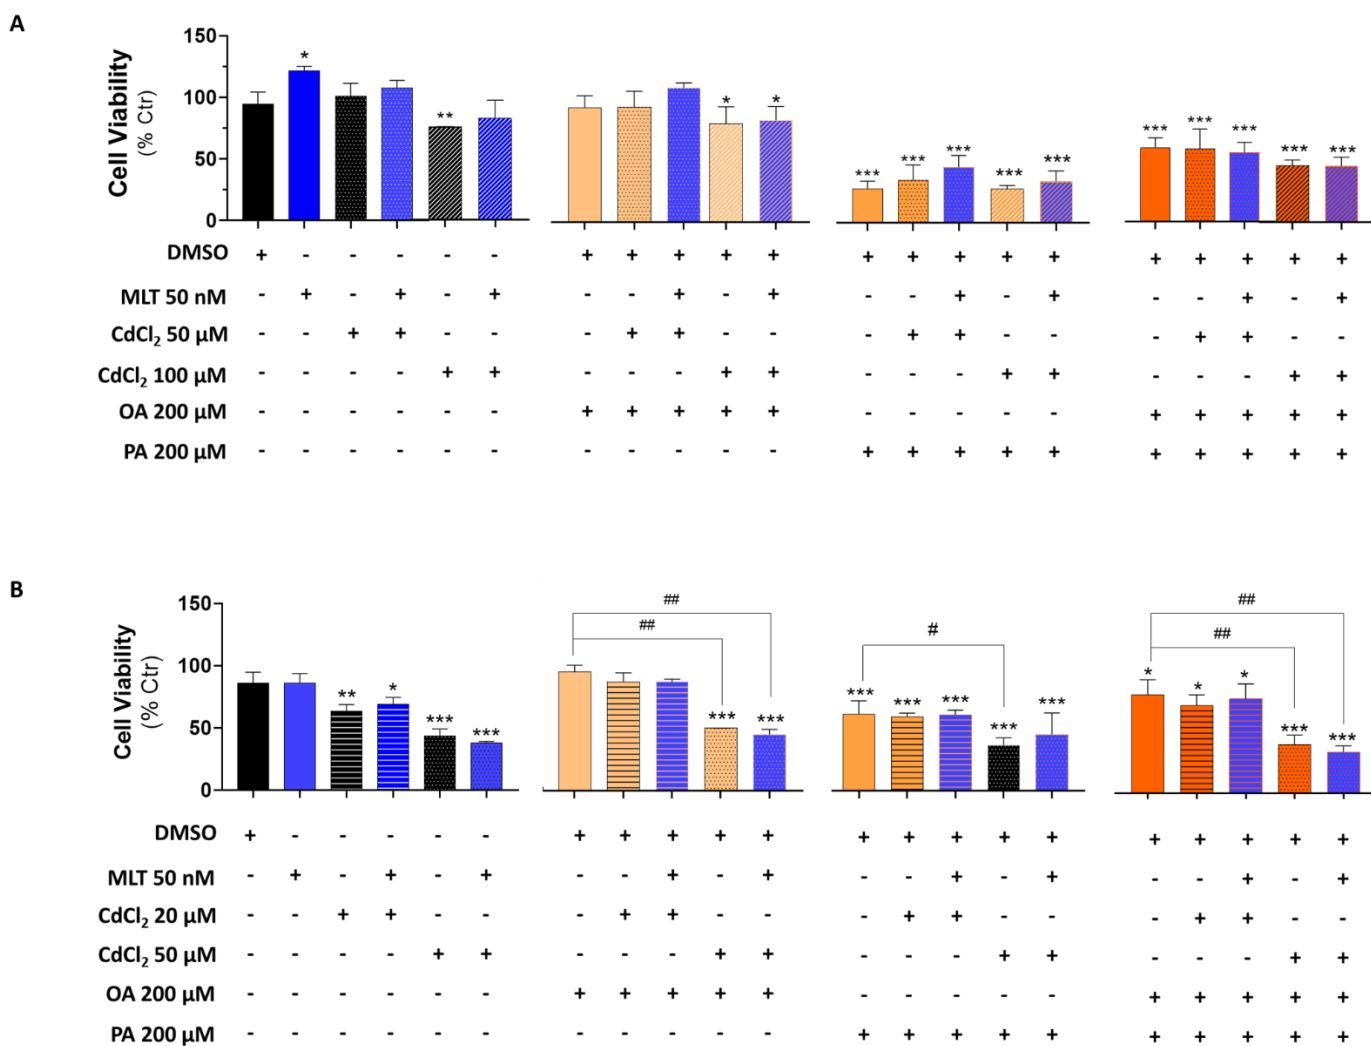

**Supplementary Figure S6. Effect of CdCl<sub>2</sub>, FFA and MLT on cell viability of the human liver cell line HepaRG and in CACO-2 intestinal cells.** The effect of Cd and FFA on cell viability of HepaRG (A) and CACO-2 (B) cells was studied with EP2 (Figure 1), in which after 24-h pre-treatment with 50 or 100 μM CdCl<sub>2</sub> for HepaRG cells and 20 and 50 μM CdCl<sub>2</sub> for CACO-2 cells, these were treated for 48 h with FFAs (200 μM) and/or the cytoprotective agent MLT (50 nm). One-way ANOVA test: \*p<0.05; \*\*p<0.01; \*\*\*p<0.001 (control vs. all treatments). #p<0.05; (CdCl<sub>2</sub> vs. all treatments); #p<0.05; ##p<0.01 (CdCl<sub>2</sub> and/or FFAs vs. CdCl<sub>2</sub> and/or FFAs + MLT).
